# Supplementary material for: Safety and Efficacy of Liraglutide in Patients With Type 2 Diabetes and End-Stage Renal Disease: An Investigator-Initiated, Placebo-Controlled, Double-Blind, Parallel-Group, Randomized Trial
Source: Oxford University Press journal article supplement (doi:10.2337/dc15-1025), 2015-08-17
Supplement: dc151025supplementarydata.pdf [file dc151025supplementarydata.pdf]

## SUPPLEMENTARY DATA

**Supplementary Figure 1. Change from baseline insulin dose and blood glucose measurements.** Percent change from baseline insulin dose during the trial period in participants treated with insulin at baseline (A) and blood glucose measurements (B) in patients with type 2 diabetes and dialysis-dependent end-stage renal disease treated with liraglutide (dark blue curves) and placebo (dark green curves) and in control persons with type 2 diabetes and normal kidney function treated with liraglutide (light blue curves) and placebo (light green curves). Data are means  $\pm$  standard error based on data from the per protocol population. Blood glucose was reduced from baseline to Week 12 in all groups ( $P < 0.01$ ). In parallel, doses of basal insulin were significantly reduced in both liraglutide-treated groups during the study period ( $P < 0.04$ ).

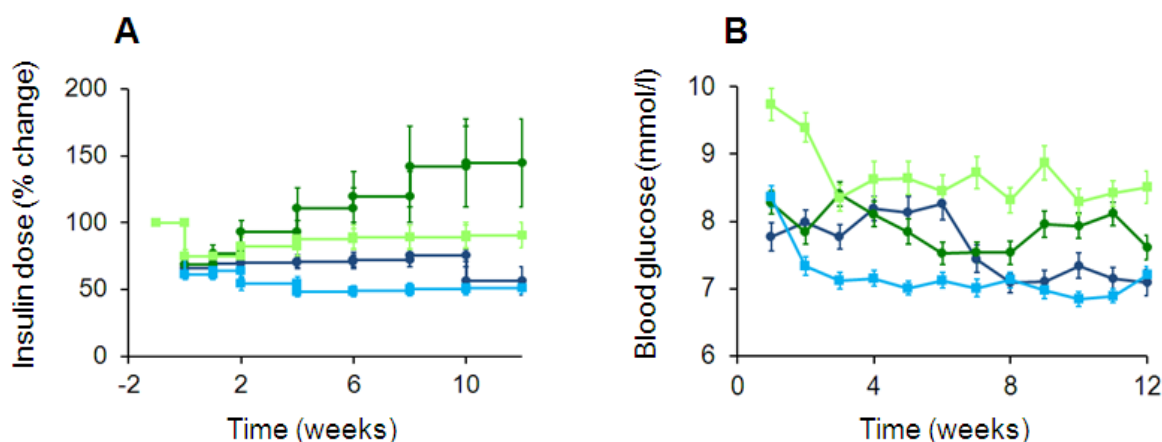

SUPPLEMENTARY DATA

**Supplementary Table 1. Clinical and biochemical changes during intervention**

|                                                       | ESRD                           |                                |                                       |       | Control                        |                                 |                                          |      |
|-------------------------------------------------------|--------------------------------|--------------------------------|---------------------------------------|-------|--------------------------------|---------------------------------|------------------------------------------|------|
|                                                       | Placebo<br>N=10                | Liraglutide<br>N=10            | Diff (95% CI)                         | P     | Placebo<br>N=10                | Liraglutide<br>N=10             | Diff (95% CI)                            | P    |
| <b>Clinical</b>                                       |                                |                                |                                       |       |                                |                                 |                                          |      |
| Weight (kg, $\Delta 0$ -12 weeks)                     | -0.2 $\pm$ 1.3                 | -2.4 $\pm$ 0.8                 | -2.1 (-5.6 to 1.4)                    | 0.22  | -0.3 $\pm$ 0.5                 | -2.9 $\pm$ 1.0                  | -2.6 (-4.8 to -0.3)                      | 0.03 |
| Pulse (min <sup>-1</sup> , $\Delta 0$ -12 weeks)      | -10.2 $\pm$ 2.7                | 6.9 $\pm$ 2.4                  | 16.4 (8.5 to 24.4)                    | <0.01 | 1.1 $\pm$ 3.9                  | 5.5 $\pm$ 2.3                   | 4.4 (-5.2 to 14.0)                       | 0.35 |
| Sys BP (mmHg, $\Delta 0$ -12 weeks)                   | -3.6 $\pm$ 6.1                 | -3.6 $\pm$ 10.4                | 0.1 (-24.7 to 24.8)                   | 1.00  | -7.4 $\pm$ 5.1                 | -3.1 $\pm$ 3.9                  | 4.3 (-9.1 to 17.7)                       | 0.51 |
| Dia BP (mmHg, $\Delta 0$ -12 weeks)                   | 0.8 $\pm$ 3.7                  | 4.8 $\pm$ 3.0                  | 4.0 (-6.2 to 14.1)                    | 0.42  | -3.7 $\pm$ 3.2                 | 0.2 $\pm$ 2.3                   | 3.9 (-4.3 to 12.1)                       | 0.33 |
| <b>Blood samples</b>                                  |                                |                                |                                       |       |                                |                                 |                                          |      |
| Haemoglobin A1c (% (mmol/mol), $\Delta 0$ -12 weeks)  | -0.4 $\pm$ 0.3<br>(-4 $\pm$ 3) | -0.5 $\pm$ 0.3<br>(-6 $\pm$ 3) | -0.1 (-1.0 to 0.7)<br>(-1 (-11 to 8)) | 0.71  | -0.3 $\pm$ 0.3<br>(-3 $\pm$ 3) | -1.3 $\pm$ 0.4<br>(-14 $\pm$ 4) | -1.0 (-2.0 to -0.1)<br>(-11 (-22 to -1)) | 0.03 |
| Creatinine ( $\mu$ mol/l, $\Delta 0$ -12 weeks)       | 0 $\pm$ 1                      | -1 $\pm$ 2                     | -1 (-11 to 8)                         | 0.78  | 1 $\pm$ 1                      | 0 $\pm$ 1                       | -2 (-11 to 7)                            | 0.72 |
| Albumin (g/l, $\Delta 0$ -12 weeks)                   | 0 $\pm$ 1                      | -1 $\pm$ 2                     | -1 (-5 to 3)                          | 0.54  | 1 $\pm$ 1                      | 0 $\pm$ 1                       | 1 (-2 to 2)                              | 0.93 |
| Alanine amino-transferase (U/l, $\Delta 0$ -12 weeks) | -2 $\pm$ 2                     | -3 $\pm$ 5                     | -1 (-11 to 8)                         | 0.78  | -3 $\pm$ 3                     | -4 $\pm$ 3                      | -2 (-11 to 7)                            | 0.72 |
| Calcitonin (pmol/l, $\Delta 0$ -12 weeks)             | -0.3 $\pm$ 0.2                 | 0.1 $\pm$ 0.8                  | 0.4 (-1.5 to 2.3)                     | 0.66  | 0.1 $\pm$ 0.1                  | 0.1 $\pm$ 0.1                   | 0.1 (-0.3 to 0.4)                        | 0.67 |
| ProBNP (pmol/l, $\Delta 0$ -12 weeks)                 | 176 $\pm$ 135                  | -184 $\pm$ 62                  | -360 (-675 to -45)                    | 0.03  | 3 $\pm$ 5                      | -1 $\pm$ 1                      | -4 (-16 to 7)                            | 0.45 |
| Total cholesterol (mmol/l, $\Delta 0$ -12 weeks)      | -0.5 $\pm$ 0.5                 | -0.3 $\pm$ 0.2                 | 0.2 (-0.9 to 1.3)                     | 0.68  | 0.2 $\pm$ 0.2                  | -0.5 $\pm$ 0.1                  | -0.7 (-1.1 to -0.2)                      | 0.01 |
| LDL cholesterol (mmol/l, $\Delta 0$ -12 weeks)        | -0.4 $\pm$ 0.4                 | -0.3 $\pm$ 0.2                 | 0.1 (-0.9 to 1.0)                     | 0.9   | 0.1 $\pm$ 0.2                  | -0.4 $\pm$ 0.1                  | -0.5 (-0.9 to -0.1)                      | 0.03 |
| HDL cholesterol (mmol/l, $\Delta 0$ -12 weeks)        | -0.1 $\pm$ 0.1                 | -0.2 $\pm$ 0.1                 | -0.1 (-0.4 to 0.2)                    | 0.47  | 0.0 $\pm$ 0.1                  | -0.1 $\pm$ 0.1                  | -0.2 (-0.3 to 0.0)                       | 0.05 |
| Triglyceride (mmol/l, $\Delta 0$ -12 weeks)           | -0.11 $\pm$ 0.33               | 0.32 $\pm$ 0.16                | 0.43 (-0.37 to 1.22)                  | 0.27  | 0.08 $\pm$ 0.16                | 0.00 $\pm$ 0.26                 | -0.08 (-0.72 to 0.57)                    | 0.81 |

Changes in clinical and biochemical parameters during intervention ( $\Delta 0$ -12 weeks) and comparison between groups. Data are presented as mean  $\pm$  standard error and mean difference between groups with 95% confidence interval in brackets. For those biochemical parameters reported with a lower detection limit an exact result was estimated as half the lower detection limit (calcitonin: 0.3 pmol/l; proBNP: 2.95 pmol/l). Dia BP, diastolic blood pressure; ESRD, end-stage renal disease; HDL, high density lipoprotein; LDL, low density lipoprotein; proBNP, prohormone brain natriuretic peptide; Sys BP, systolic blood pressure.

## SUPPLEMENTARY DATA

**Supplementary Table 2. Adverse events**

|                                          | <b>ESRD +<br/>liraglutide</b> | <b>ESRD +<br/>placebo</b> | <b>Control +<br/>liraglutide</b> | <b>Control +<br/>placebo</b> | <b><i>P</i></b> |
|------------------------------------------|-------------------------------|---------------------------|----------------------------------|------------------------------|-----------------|
| <b>N</b>                                 | <b>14</b>                     | <b>10</b>                 | <b>11</b>                        | <b>12</b>                    |                 |
| <b>Gastrointestinal</b>                  |                               |                           |                                  |                              |                 |
| Nausea (days)                            | [200]<br>4 (86) *             | [52]<br>1 (35)            | [59]<br>0 (22)                   | [7]<br>0 (7)                 | 0.06            |
| Vomiting (days)                          | [71]<br>1 (43) *              | [2]<br>0 (2)              | [8]<br>0 (4)                     | [0]<br>0 (0)                 | 0.02            |
| Diarrhoea (days)                         | [13]<br>0 (5)                 | [14]<br>0 (9)             | [63]<br>0 (37) *                 | [4]<br>0 (3)                 | 0.01            |
| Dyspepsia (days)                         | [176]<br>3 (51)               | [1]<br>0 (1)              | [155]<br>5 (61)                  | [3]<br>0 (3)                 | 0.136           |
| Reduced appetite (days)                  | [216]<br>0 (83)               | [9]<br>0 (9)              | [184]<br>28 (83)                 | [88]<br>0 (88)               | 0.10            |
| Flatulence (days)                        | [0]<br>0 (0)                  | [77]<br>0 (70)            | [90]<br>2 (53)                   | [21]<br>0 (13)               | 0.20            |
| Abdominal discomfort (days)              | [14]<br>0 (14)                | [40]<br>0 (18)            | [128]<br>0 (59) *                | [6]<br>0 (4)                 | < 0.01          |
| Constipation (days)                      | [6]<br>0 (4)                  | [49]<br>0 (21)            | [18]<br>0 (11)                   | [24]<br>0 (24)               | 0.12            |
| <b>Miscellaneous</b>                     |                               |                           |                                  |                              |                 |
| Headache (days)                          | [1]<br>0 (1)                  | [50]<br>0 (28)            | [44]<br>2 (19)                   | [24]<br>0 (15)               | 0.29            |
| Dizziness (days)                         | [9]<br>0 (9)                  | [32]<br>0 (19)            | [8]<br>0 (8)                     | [17]<br>0 (9)                | 0.17            |
| Fatigue (days)                           | [98]<br>0 (84)                | [135]<br>6 (42)           | [148]<br>7 (48)                  | [25]<br>0 (14)               | 0.20            |
| Fever (days)                             | [1]<br>0 (1)                  | [2]<br>0 (2)              | [20]<br>0 (12) *                 | [5]<br>0 (5)                 | 0.01            |
| Nasopharyngitis/bronchitis<br>(episodes) | [3]<br>0 (1)                  | [6]<br>1 (1)              | [6]<br>0 (2)                     | [2]<br>0 (1)                 | 0.16            |
| Minor hypoglycaemia<br>(episodes)        | [9]<br>1 (3)                  | [3]<br>0 (1)              | [0]<br>0 (0)                     | [10]<br>0 (5)                | 0.34            |
| Injection site reactions<br>(episodes)   | [2]<br>0 (1)                  | [4]<br>0 (1)              | [7]<br>1 (2)                     | [5]<br>0 (2)                 | 0.27            |

Adverse events in the intention to treat population. Data are sum in square brackets, median and range in normal brackets. Asterisks (\*) indicate  $P < 0.05$ .

# SUPPLEMENTARY DATA

**Supplementary Table 3. Severe adverse events, drop outs and exclusions**

|                                                    | <b>ESRD<br/>N=24</b>                                                                                                                                                                                                                                                | <b>Liraglutide<br/>group (Y/N)</b>                                                                            | <b>Control<br/>N=23</b>                                                                                                          | <b>Liraglutide<br/>group (Y/N)</b>                                        |
|----------------------------------------------------|---------------------------------------------------------------------------------------------------------------------------------------------------------------------------------------------------------------------------------------------------------------------|---------------------------------------------------------------------------------------------------------------|----------------------------------------------------------------------------------------------------------------------------------|---------------------------------------------------------------------------|
| <b>Severe<br/>adverse<br/>event<br/>(cause, N)</b> | <ul style="list-style-type: none"> <li>- Chest pain and infection (N=1)</li> <li>- Clotted AV fistula (N=2)</li> <li>- Catheter infection (N=1)</li> <li>- GI bleeding (N=1)</li> <li>- Lumbar spinal stenosis (N=1)</li> <li>- Appendicitis acuta (N=1)</li> </ul> | <ul style="list-style-type: none"> <li>Y</li> <li>Y, Y</li> <li>Y</li> <li>N</li> <li>Y</li> <li>Y</li> </ul> | <ul style="list-style-type: none"> <li>- Knee arthroscopy (N=1)</li> </ul>                                                       | <ul style="list-style-type: none"> <li>Y</li> </ul>                       |
| <b>Dropout/<br/>exclusion<br/>(cause, N)</b>       | <ul style="list-style-type: none"> <li>- Low compliance (N=1)</li> <li>- Admittance (N=2)</li> <li>- Change in dialysis location (N=1)</li> <li>- Holiday (N=1; included in the PP population)</li> </ul>                                                           | <ul style="list-style-type: none"> <li>Y</li> <li>Y, Y</li> <li>Y</li> <li>Y</li> </ul>                       | <ul style="list-style-type: none"> <li>- Time consumption (N=1)</li> <li>- Dizziness (N=1)</li> <li>- Exanthema (N=1)</li> </ul> | <ul style="list-style-type: none"> <li>N</li> <li>N</li> <li>Y</li> </ul> |

Based on data from the intention to treat population. All severe adverse events led to admission. AV, arterio-venous; GI, gastrointestinal; PP, per protocol
